# Supplementary material
Source: MDPI journal article supplement (https://www.mdpi.com/2073-8994/13/5/739)
Supplement: s1 [file s1]

Supplementary files are:

- Six 3DPDF files, each showing one vertebra from C2 to C7 with representative tropism data from ten participants. The sides of the triangles indicate the orientation of the facets on each side of the vertebra for one participant. The triangles therefore indicate the direction and magnitude of tropism similar to what is shown on Figure 3D of the manuscript. All rays are aligned to the centre of the left facet of one participant for ease of interpretation.
- MRI in rotated position prior to segmentation
- Segmented cervical spine in rotated position
